# Supplementary material
Source: Elsevier journal article supplement (https://www.sciencedirect.com/science/article/pii/S0033833821001442)
Supplement: mmc1 [file S0033833821001442:mmc1.pdf]

| Criterio                                                                                                                  | Aydin         | Li            | Bang          | Yildiz | Kay-Rivest | Frates | Kabaalioglu | Erol          | Vlachopa      | Yildiz        | Fukushima | Segni | Kim | Bang | Avula         | Janus         |
|---------------------------------------------------------------------------------------------------------------------------|---------------|---------------|---------------|--------|------------|--------|-------------|---------------|---------------|---------------|-----------|-------|-----|------|---------------|---------------|
| 1. ¿Se disponia de criterios claros para la inclusión en la serie de casos?                                               | Sí            | Sí            | Sí            | Sí     | Sí         | Sí     | Sí          | Sí            | Sí            | Sí            | Sí        | Sí    | Sí  | Sí   | Sí            | Sí            |
| 2. ¿Se evaluó el caso de una forma estándar y fiable en todos los participantes incluidos en la serie de casos?           | Sí            | Sí            | Sí            | Sí     | Sí         | Sí     | Sí          | Sí            | Sí            | Sí            | Sí        | Sí    | Sí  | Sí   | Sí            | Sí            |
| 3. ¿Se utilizaron métodos válidos para identificar la anomalía en todos los participantes incluidos en la serie de casos? | Sí            | Sí            | Sí            | Sí     | Sí         | Sí     | Sí          | No está claro | Sí            | Sí            | Sí        | Sí    | Sí  | No   | No está claro | Sí            |
| 4. ¿Realizó la serie de casos una inclusión consecutiva de los participantes?                                             | No            | No            | No            | Sí     | Sí         | Sí     | Sí          | No            | No            | Sí            | Sí        | Sí    | No  | No   | No            | No está claro |
| 5. ¿Realizó la serie de casos una inclusión completa de los participantes?                                                | No está claro | No está claro | No está claro | Sí     | Sí         | Sí     | Sí          | Sí            | No está claro | No está claro | Sí        | Sí    | Sí  | Sí   | Sí            | Sí            |
| 6. ¿Se incluyeron datos claros de las características demográficas de los participantes en el estudio?                    | Sí            | Sí            | Sí            | Sí     | Sí         | Sí     | Sí          | Sí            | No            | Sí            | Sí        | Sí    | Sí  | Sí   | Sí            | Sí            |
| 7. ¿Se incluyó información clínica clara de los participantes en el estudio?                                              | Sí            | Sí            | Sí            | Sí     | Sí         | Sí     | Sí          | Sí            | Sí            | Sí            | Sí        | Sí    | Sí  | Sí   | Sí            | Sí            |
| 8. ¿Se notificaron claramente los desenlaces o los resultados del seguimiento de los casos?                               | No está claro | No está claro | No está claro | No     | Sí         | Sí     | Sí          | Sí            | No            | No            | Sí        | Sí    | Sí  | Sí   | No está claro | Sí            |
| 9. ¿Se incluyó información clara de las características demográficas del (de los) centro(s)/clínica(s)?                   | No            | Sí            | No está claro | Sí     | Sí         | Sí     | Sí          | Sí            | No está claro | No está claro | Sí        | Sí    | Sí  | Sí   | Sí            | Sí            |
